# Supplementary material for: Evaluation of anti-diabetic and alpha glucosidase inhibitory action of anthraquinones from Rheum emodi
Source: Royal Society of Chemistry journal article supplement (doi:10.1039/c5fo00519a), 2015-01-01
Supplement: c5fo00519a1.pdf [file c5fo00519a1.pdf]

## SUPPLEMENTARY DATA

### 1. Spectroscopic data of isolated compounds:

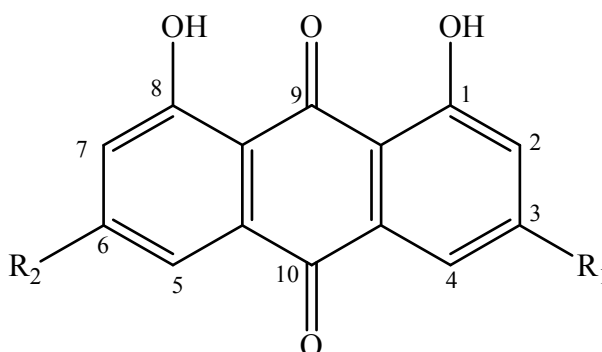

| Compound     | R <sub>1</sub>     | R <sub>2</sub>  |
|--------------|--------------------|-----------------|
| Rhein        | COOH               | H               |
| Aloe emodin  | CH <sub>2</sub> OH | H               |
| Emodin       | OH                 | CH <sub>3</sub> |
| Chrysophanol | CH <sub>3</sub>    | H               |
| Physcion     | OCH <sub>3</sub>   | CH <sub>3</sub> |

Rhein: mp 352-354°C (from MeOH). IR (CHCl<sub>3</sub>): 3422, 3206, 1691, 1629cm<sup>-1</sup>. <sup>1</sup>H NMR (400 MHz, CDCl<sub>3</sub>, Me<sub>4</sub>Si) δ: 12.00 (1H, s, C<sub>1</sub>-OH), 11.98 (1H, s, C<sub>8</sub>-OH), 11.01(1H, broad, -COOH), 8.4 (1H, s, C<sub>2</sub>-H), 7.93 (1H, s, C<sub>4</sub>-H), 7.81(1H, d, J = 7.5 Hz, C<sub>7</sub>-H), 7.80 (1H, m, C<sub>6</sub>-H), 7.38 (1H, d, J = 8.2 Hz, C<sub>5</sub>-H). ESI-MS (M+1<sup>+</sup>): 285.00.

Aloe emodin: mp 222-224°C (from MeOH). IR (CHCl<sub>3</sub>): 3600-3000 (broad), 1651, 1633cm<sup>-1</sup>. <sup>1</sup>H NMR (400 MHz, CDCl<sub>3</sub>, Me<sub>4</sub>Si) δ: 11.94 (1H, s, C<sub>1</sub>-OH), 11.92 (1H, s, C<sub>8</sub>-OH), 7.94 (1H, d, J = 6.8 Hz, C<sub>5</sub>-H), 7.71 (1H, s, C<sub>4</sub>-H), 7.38 (1H, m, C<sub>6</sub>-H), 7.32 (1H, d, J = 8.4 Hz, C<sub>7</sub>-H), 7.28 (1H, s, C<sub>2</sub>-H), 5.58 (1H, s, -CH<sub>2</sub>-OH), 4.62 (2H, s, -CH<sub>2</sub>-). ESI-MS (M+1<sup>+</sup>): 271.01.

Emodin: mp 252-254°C (from MeOH). IR (CHCl<sub>3</sub>): 3389, 1676, 1610cm<sup>-1</sup>. <sup>1</sup>H NMR (400 MHz, CDCl<sub>3</sub>, Me<sub>4</sub>Si) δ: 12.27 (1H, s, C<sub>3</sub>-OH), 12.11 (1H, s, C<sub>1</sub>-OH), 12.01 (1H, s, C<sub>8</sub>-OH), 7.70 (1H, s, C<sub>5</sub>-H), 7.26 (1H, d, J = 2.1 Hz, C<sub>4</sub>-H), 7.08 (1H, s, C<sub>7</sub>-H), 6.67 (1H, d, J = 2.1 Hz, C<sub>2</sub>-H), 2.35 (3H, s, CH<sub>3</sub>); ESI-MS (M+1<sup>+</sup>): 271.30.

Chrysophanol: mp 194-196°C (from MeOH). IR (CHCl<sub>3</sub>): 3420, 1676, 1626cm<sup>-1</sup>. <sup>1</sup>H NMR (400 MHz, CDCl<sub>3</sub>, Me<sub>4</sub>Si) δ: 12.13 (1H, s, C<sub>1</sub>-OH), 12.02 (1H, s, C<sub>8</sub>-OH), 7.84 (1H, d, J = 7.1 Hz, C<sub>5</sub>-H), 7.68 (1H, m, C<sub>6</sub>-H), 7.67 (1H, s, C<sub>4</sub>-H), 7.28 (1H, d, J = 8.2 Hz, C<sub>7</sub>-H), 7.11(1H, s, C<sub>2</sub>-H), 2.47 (3H, s, -CH<sub>3</sub>). ESI-MS (M+1<sup>+</sup>): 255.24.

Physcion: mp 207-209°C (from MeOH). IR (CHCl<sub>3</sub>): 3423, 1609 (broad), 1364cm<sup>-1</sup>. <sup>1</sup>H NMR (400 MHz, CDCl<sub>3</sub>, Me<sub>4</sub>Si) δ: 12.11 (1H, s, C<sub>1</sub>-OH), 12.00 (1H, s, C<sub>8</sub>-OH), 7.64 (1H, s, C<sub>5</sub>-H), 7.38 (1H, d, J = 2.1 Hz, C<sub>4</sub>-H), 7.09 (1H, s, C<sub>7</sub>-H), 6.70 (1H, d, J = 2.1 Hz, C<sub>2</sub>-H), 3.93 (3H, s, -OCH<sub>3</sub>), 2.46 (3H, s, -CH<sub>3</sub>). ESI-MS (M+1<sup>+</sup>): 285.26.

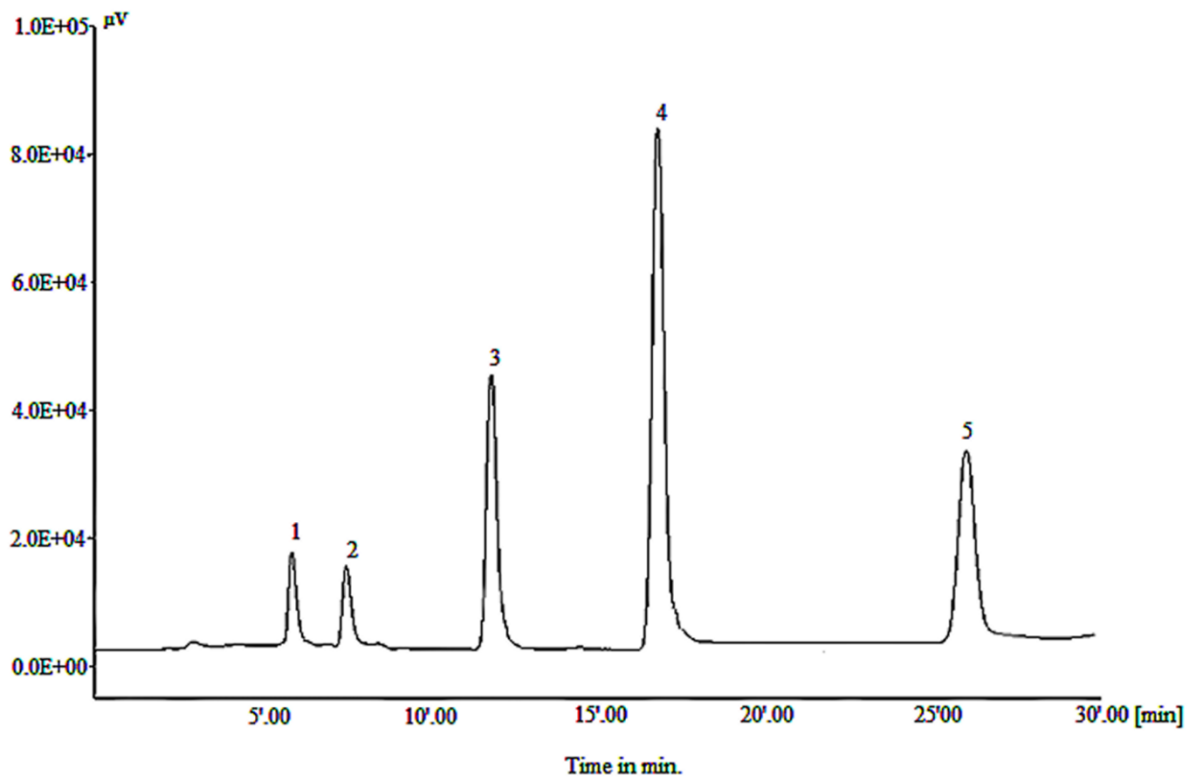

**Fig.1:** HPLC chromatogram of isolated 1,8-dihydroxyquinones: (1) aloë emodin – 5.8 min; (2) rhein – 7.4 min; (3) emodin – 11.9 min; (4) chrysophanol – 16.9 min; (5) physcion – 25.7 min. HPLC demonstrated a %purity > 98%.

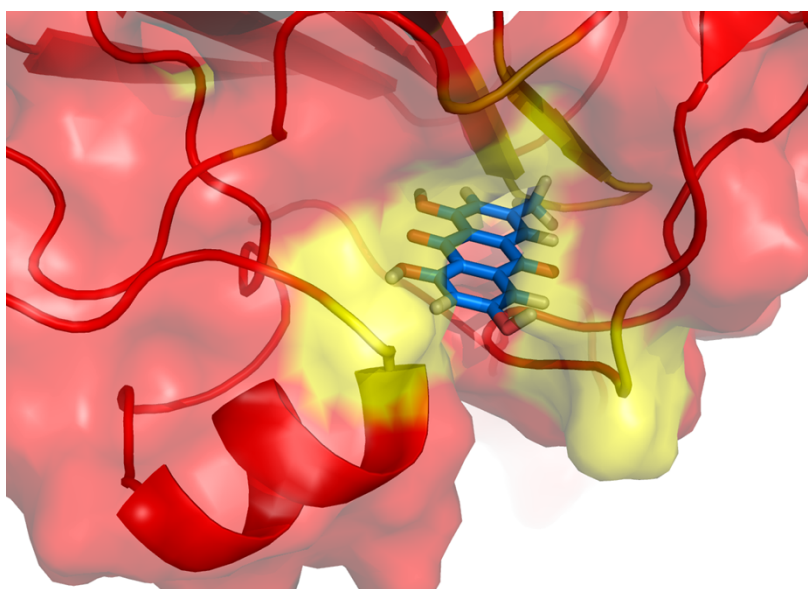

**Fig.2:** Surface representation of ‘Quinone binding site’ with favoured pose of most active emodin, interacting residue surface has been coloured in yellow for locating site. (Figure prepared using PyMol [<http://www.pymol.org>]).
